# Supplementary material for: Agreement Between Arterial Carbon Dioxide Levels With End-Tidal Carbon Dioxide Levels and Associated Factors in Children Hospitalized With Traumatic Brain Injury
Source: PubMed Central journal article supplement (PMC6704750; doi:10.1001/jamanetworkopen.2019.9448), 2019-08-16
Supplement: jamanetwopen-2-e199448-s001.pdf [file jamanetwopen-2-e199448-s001.pdf]

## Supplementary Online Content

Yang J-T, Erickson SL, Killien EY, Mills B, Lele AV, Vavilala MS. Agreement between arterial carbon dioxide levels with end-tidal carbon dioxide levels and associated factors in children hospitalized with traumatic brain injury. *JAMA Netw Open*. 2019;2(8):e199448. doi:10.1001/jamanetworkopen.2019.9448

**eTable 1.** Characteristics of Study Cohort (n =137) Compared With Those Who Were Excluded (n=62)

**eTable 2.** Fitted Regression Models and Covariates for the Factors Associated With Agreement Between PaCO<sub>2</sub> and EtCO<sub>2</sub>

**eTable 3.** Positive Predictive Values, Negative Predictive Values, Sensitivity and Specificity by Using PaCO<sub>2</sub>-EtCO<sub>2</sub> Difference in PICU Day 1 and Its Association With Subsequent Pediatric Acute Respiratory Distress Syndrome (PARDS) Development Between 1-7 days After PICU Admission

**eFigure 1.** Example Sampling of PaCO<sub>2</sub>, EtCO<sub>2</sub> and Systolic Blood Pressure (SBP)

**eFigure 2.** Histogram of the Number of PaCO<sub>2</sub>-EtCO<sub>2</sub> Pairs Per Patient

**eFigure 3.** Passing and Bablok Regression Plot of PaCO<sub>2</sub> and EtCO<sub>2</sub>

**eFigure 4.** Deming Regression Plot of PaCO<sub>2</sub> and EtCO<sub>2</sub>

**eFigure 5.** Bland-Altman Plots of PaCO<sub>2</sub> and EtCO<sub>2</sub> Stratified by Age in Years

**eFigure 6.** Side-by-Side Boxplots of PaCO<sub>2</sub>-EtCO<sub>2</sub> Differences Stratified by Patient

This supplementary material has been provided by the authors to give readers additional information about their work.

**eTable 1.** Characteristics of Study Cohort (n =137) Compared With Those Who Were Excluded (n=62)

|                                                                                   | Study Cohort         | Excluded             |
|-----------------------------------------------------------------------------------|----------------------|----------------------|
| n                                                                                 | 137                  | 62                   |
| <b>Age (yr), n (%)</b>                                                            |                      |                      |
| < 1                                                                               | 8 (5.8)              | 11 (17.7)            |
| 1 - 4                                                                             | 32 (23.4)            | 13 (21.0)            |
| 5 - 9                                                                             | 21 (15.3)            | 6 (9.7)              |
| 10 - 14                                                                           | 15 (10.9)            | 9 (14.5)             |
| 15 - 18                                                                           | 61 (44.5)            | 23 (37.1)            |
| <b>Male sex, n (%)</b>                                                            | 103 (75.2)           | 38 (61.3)            |
| <b>Mechanism, n (%)</b>                                                           |                      |                      |
| Motor vehicle crash                                                               | 46 (33.6)            | 20 (32.3)            |
| Fall                                                                              | 30 (21.9)            | 19 (30.6)            |
| Struck by vehicle                                                                 | 31 (22.6)            | 10 (16.1)            |
| Abusive TBI                                                                       | 7 (5.1)              | 8 (12.9)             |
| Sport/recreation                                                                  | 11 (8.0)             | 4 (6.5)              |
| Gunshot                                                                           | 12 (8.8)             | 0 (0.0)              |
| Other                                                                             | 0 (0.0)              | 1 (1.6)              |
| <b>Head Abbreviated Injury Scale (AIS), median (IQR)</b>                          | 5.00 [4.00, 5.00]    | 4.00 [4.00, 5.00]    |
| <b>Chest Abbreviated Injury Scale (AIS), median (IQR)</b>                         | 3.00 [2.00, 3.00]    | 3.00 [2.00, 3.00]    |
| <b>Injury Severity Score (ISS), median (IQR)</b>                                  | 30.00 [25.00, 38.00] | 26.00 [17.00, 33.00] |
| <b>Polytrauma, n (%)</b>                                                          | 67 (48.9)            | 19 (30.6)            |
| <b>ED admit Glasgow Coma Scale score, median (IQR)</b>                            | 3.00 [3.00, 6.00]    | 3.00 [3.00, 6.00]    |
| <b>ED Glasgow Coma Scale (motor), median (IQR)</b>                                | 1.00 [1.00, 1.00]    | 1.00 [1.00, 1.00]    |
| <b>PICU admit Glasgow Coma Scale score, median (IQR)</b>                          | 6.50 [3.00, 8.00]    | 10.00 [8.00, 13.00]  |
| <b>Discharge Glasgow Coma Scale score (motor), median (IQR)</b>                   | 6.00 [6.00, 6.00]    | 6.00 [6.00, 6.00]    |
| <b>Any surgery, n (%)</b>                                                         | 74 (54.0)            | 48 (77.4)            |
| <b>Craniotomy, n (%)</b>                                                          | 46 (33.6)            | 10 (16.1)            |
| <b>Intracranial pressure monitoring, n (%)</b>                                    | 62 (45.3)            | 10 (16.1)            |
| <b>Experienced brain herniation, n (%)</b>                                        | 63 (46.0)            | 15 (24.2)            |
| <b>Discharge survival, n(%)</b>                                                   | 103 (75.2)           | 57 (91.9)            |
| TBI = Traumatic Brain Injury, GCS = Glasgow Coma Score, ED = Emergency Department |                      |                      |

**eTable 2.** Fitted Regression Models and Covariates for the Factors Associated With Agreement Between PaCO<sub>2</sub> and EtCO<sub>2</sub>

Covariates for OR of PARDS within 24 hours of PICU admission, head injury severity, chest injury severity, maximum non-head non-chest injury severity

|                                                              | <b>Estimate</b> | <b>Lower Limit</b> | <b>Upper Limit</b> |
|--------------------------------------------------------------|-----------------|--------------------|--------------------|
| Intercept                                                    | 0.335426        | 0.060519           | 1.859078           |
| PARDS within 24 hours of PICU admission                      | 0.199728        | 0.078236           | 0.509883           |
| PaCO <sub>2</sub> -EtCO <sub>2</sub> pair during hypotension | 1.118286        | 0.571751           | 2.187255           |
| severe chest injury                                          | 1.434578        | 0.809199           | 2.543272           |
| 1 – 4 years of age                                           | 1.466849        | 0.447627           | 4.806787           |
| 5 – 9 years of age                                           | 1.097218        | 0.30676            | 3.924523           |
| 10 – 14 years of age                                         | 1.789781        | 0.504194           | 6.353345           |
| 15 – 18 years of age                                         | 1.593966        | 0.513088           | 4.951838           |
| severe head injury                                           | 1.494089        | 0.415851           | 5.368037           |
| severe non head, non chest injury                            | 1.14226         | 0.660425           | 1.975633           |

Covariates for OR of PARDS 1 – 7 days after PICU admission

|                                                              | <b>Estimate</b> | <b>Lower Limit</b> | <b>Upper Limit</b> |
|--------------------------------------------------------------|-----------------|--------------------|--------------------|
| Intercept                                                    | 0.238089        | 0.02787            | 2.033937           |
| PARDS 1-7 days after PICU admission                          | 1.224181        | 0.611668           | 2.450055           |
| PaCO <sub>2</sub> -EtCO <sub>2</sub> pair during hypotension | 1.228887        | 0.578263           | 2.611549           |
| severe chest injury                                          | 1.579863        | 0.831677           | 3.001127           |
| 1 – 4 years of age                                           | 1.347879        | 0.41099            | 4.420489           |
| 5 – 9 years of age                                           | 1.172141        | 0.321375           | 4.275111           |
| 10 – 14 years of age                                         | 2.093238        | 0.584019           | 7.502574           |
| 15 – 18 years of age                                         | 1.607609        | 0.51561            | 5.012333           |
| severe head injury                                           | 1.967799        | 0.3209             | 12.06681           |
| severe non head, non chest injury                            | 1.068462        | 0.606541           | 1.882167           |

Covariates for OR of Hypotension status of PaCO<sub>2</sub>-EtCO<sub>2</sub> pair with fixed effect

|                                                              | <b>Estimate</b> | <b>Lower Limit</b> | <b>Upper Limit</b> |
|--------------------------------------------------------------|-----------------|--------------------|--------------------|
| PaCO <sub>2</sub> -EtCO <sub>2</sub> pair during hypotension | 0.675           | 0.3024             | 1.507              |

**eTable 3.** Positive Predictive Values, Negative Predictive Values, Sensitivity and Specificity by Using PaCO<sub>2</sub>-EtCO<sub>2</sub> Difference in PICU Day 1 and Its Association With Subsequent Pediatric Acute Respiratory Distress Syndrome (PARDS) Development Between 1-7 days After PICU Admission

Paired data points for this table were from patients who had not developed PARDS within the first 24 hours.

| <b>PaCO<sub>2</sub> – EtCO<sub>2</sub><br/>difference cutoff (mmHg)</b>                                                                               | <b>TP / FP / FN / TN</b> | <b>PPV</b> | <b>NPV</b> | <b>Sensitivity</b> | <b>Specificity</b> |
|-------------------------------------------------------------------------------------------------------------------------------------------------------|--------------------------|------------|------------|--------------------|--------------------|
| ≥1                                                                                                                                                    | 76 / 129 / 16 / 157      | 0.37       | 0.91       | 0.83               | 0.55               |
| ≥2                                                                                                                                                    | 71 / 96 / 21 / 190       | 0.43       | 0.90       | 0.77               | 0.66               |
| ≥3                                                                                                                                                    | 66 / 80 / 26 / 206       | 0.45       | 0.89       | 0.72               | 0.72               |
| ≥4                                                                                                                                                    | 55 / 53 / 37 / 233       | 0.51       | 0.86       | 0.60               | 0.81               |
| ≥5                                                                                                                                                    | 40 / 34 / 52 / 252       | 0.54       | 0.83       | 0.43               | 0.88               |
| ≥6                                                                                                                                                    | 34 / 26 / 58 / 260       | 0.57       | 0.82       | 0.37               | 0.91               |
| ≥7                                                                                                                                                    | 29 / 18 / 63 / 268       | 0.62       | 0.81       | 0.32               | 0.94               |
| ≥8                                                                                                                                                    | 19 / 14 / 73 / 272       | 0.58       | 0.79       | 0.21               | 0.95               |
| ≥9                                                                                                                                                    | 15 / 11 / 77 / 275       | 0.58       | 0.78       | 0.16               | 0.95               |
| ≥10                                                                                                                                                   | 7 / 10 / 85 / 276        | 0.41       | 0.76       | 0.08               | 0.97               |
| TP = true positive, FP = false positive, FN = false negative, TN = true negative,<br>PPV = positive predictive value, NPV = negative predictive value |                          |            |            |                    |                    |

**eFigure 1.** Example Sampling of PaCO<sub>2</sub>, EtCO<sub>2</sub> and Systolic Blood Pressure (SBP)

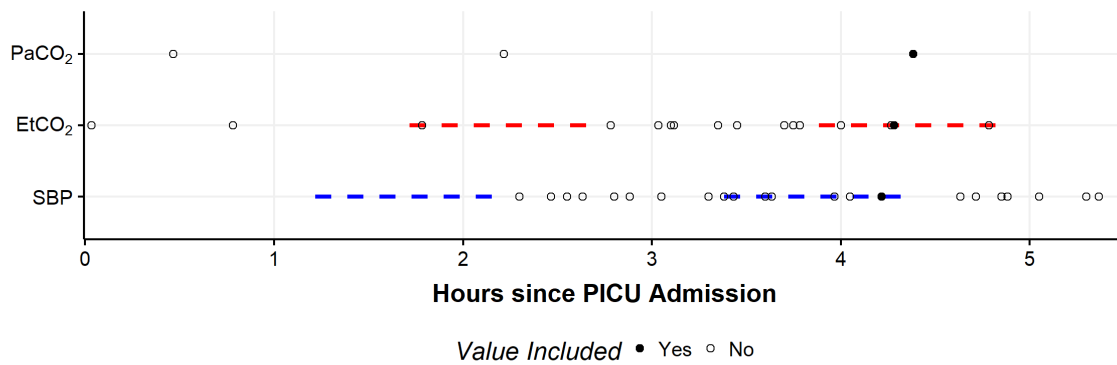

Plot shows all PaCO<sub>2</sub> (n = 3), EtCO<sub>2</sub> (n = 31) and systolic blood pressure values (n = 30) for one patient during the first 5 hours of PICU admission. PaCO<sub>2</sub> was aligned to the most proximally recorded EtCO<sub>2</sub> within 30 minutes before or after the time of blood draw (example ranges highlighted in red). PaCO<sub>2</sub> was aligned to the most proximally recorded SBP value 0 to 60 minutes prior to the time of blood draw (example ranges highlighted in blue). PaCO<sub>2</sub> values that were not able to be paired with both an EtCO<sub>2</sub> value and an SBP value were not included in final analysis. In this example, two PaCO<sub>2</sub> values were discarded (unfilled circles) as they were unable to be paired with a SBP value. In our study, of the 62 patients who were excluded, 25 patients lacked a recorded EtCO<sub>2</sub> value, 17 patients lacked an EtCO<sub>2</sub> recorded within 30 minutes of a PaCO<sub>2</sub> value, and 20 patients lacked SBP data within 60 minutes prior to a PaCO<sub>2</sub> value.

**eFigure 2.** Histogram of the Number of PaCO<sub>2</sub>-EtCO<sub>2</sub> Pairs Per Patient

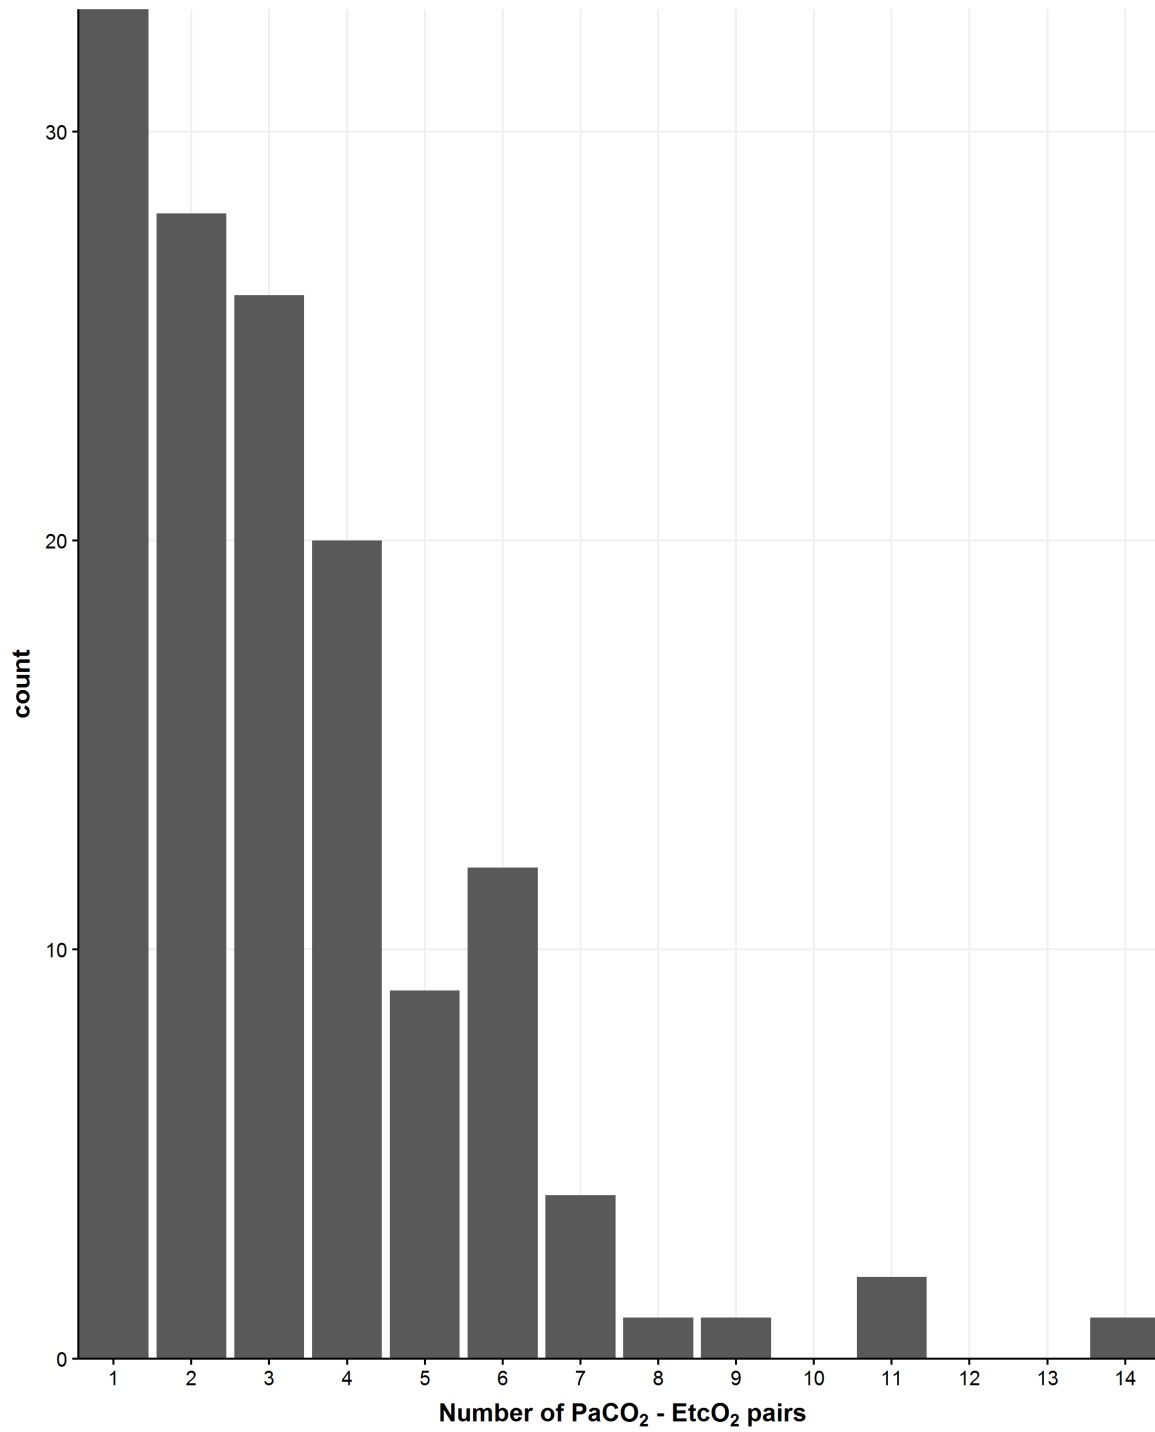

Data represents 445 PaCO<sub>2</sub>-EtCO<sub>2</sub> pairs for 137 patients.

**eFigure 3.** Passing and Bablok Regression Plot of PaCO<sub>2</sub> and EtCO<sub>2</sub>

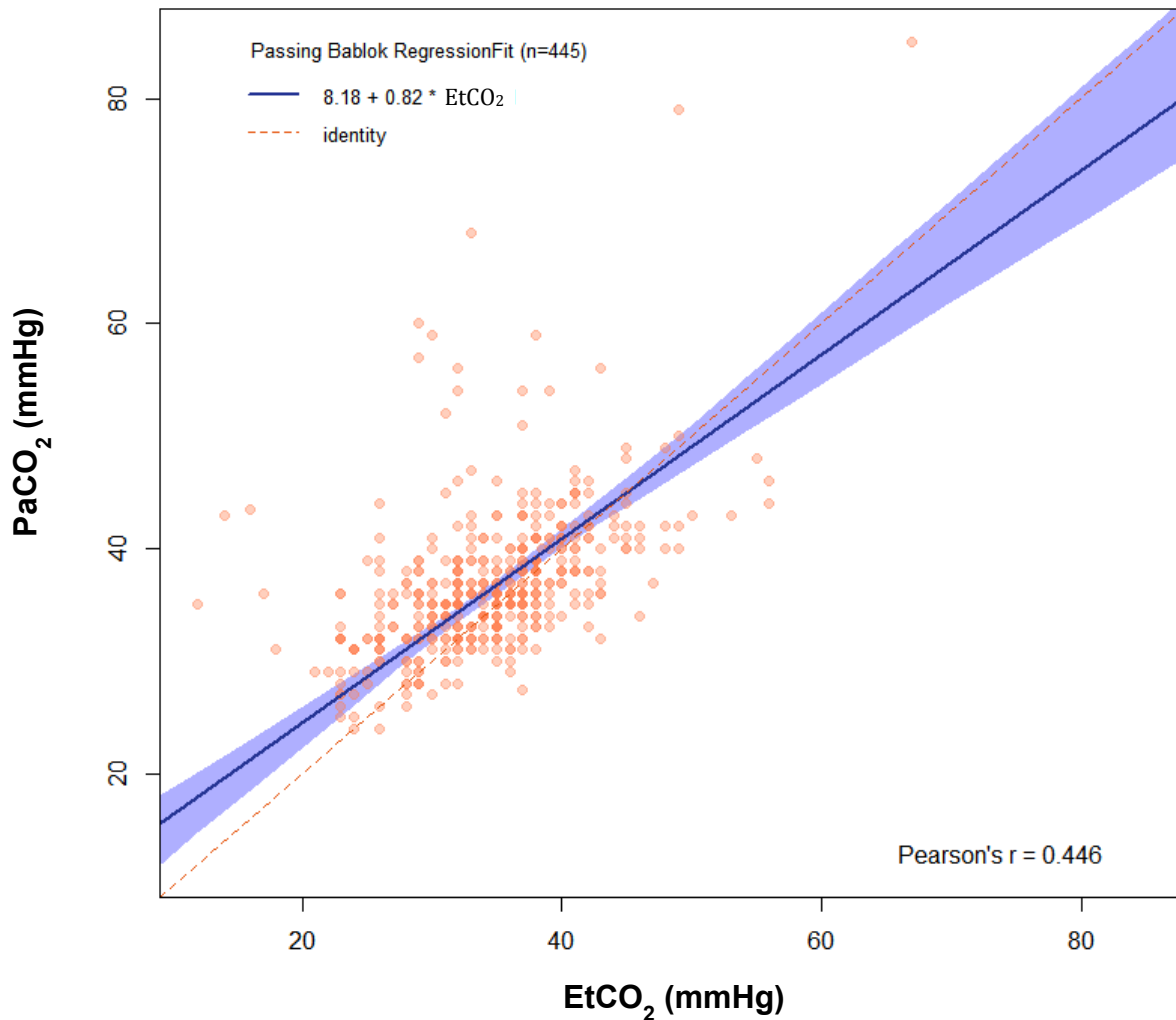

Red dots represent the 445 PaCO<sub>2</sub> - EtCO<sub>2</sub> pairs for 137 unique patients. Blue line represents the fitted Passing and Bablok regression line. Red dotted line indicates a theoretical fitted Passing and Bablok line with no absolute constant difference between measures (intercept of zero), and no proportional difference between measures (slope of one). EtCO<sub>2</sub> demonstrated the highest degree of interchangeability with PaCO<sub>2</sub> at 45.44mmHg; with a proportional difference of 0.81mmHg (95% CI 0.72 – 1.00) of PaCO<sub>2</sub> per 1mmHg of EtCO<sub>2</sub>.

**eFigure 4.** Deming Regression Plot of PaCO<sub>2</sub> and EtCO<sub>2</sub>

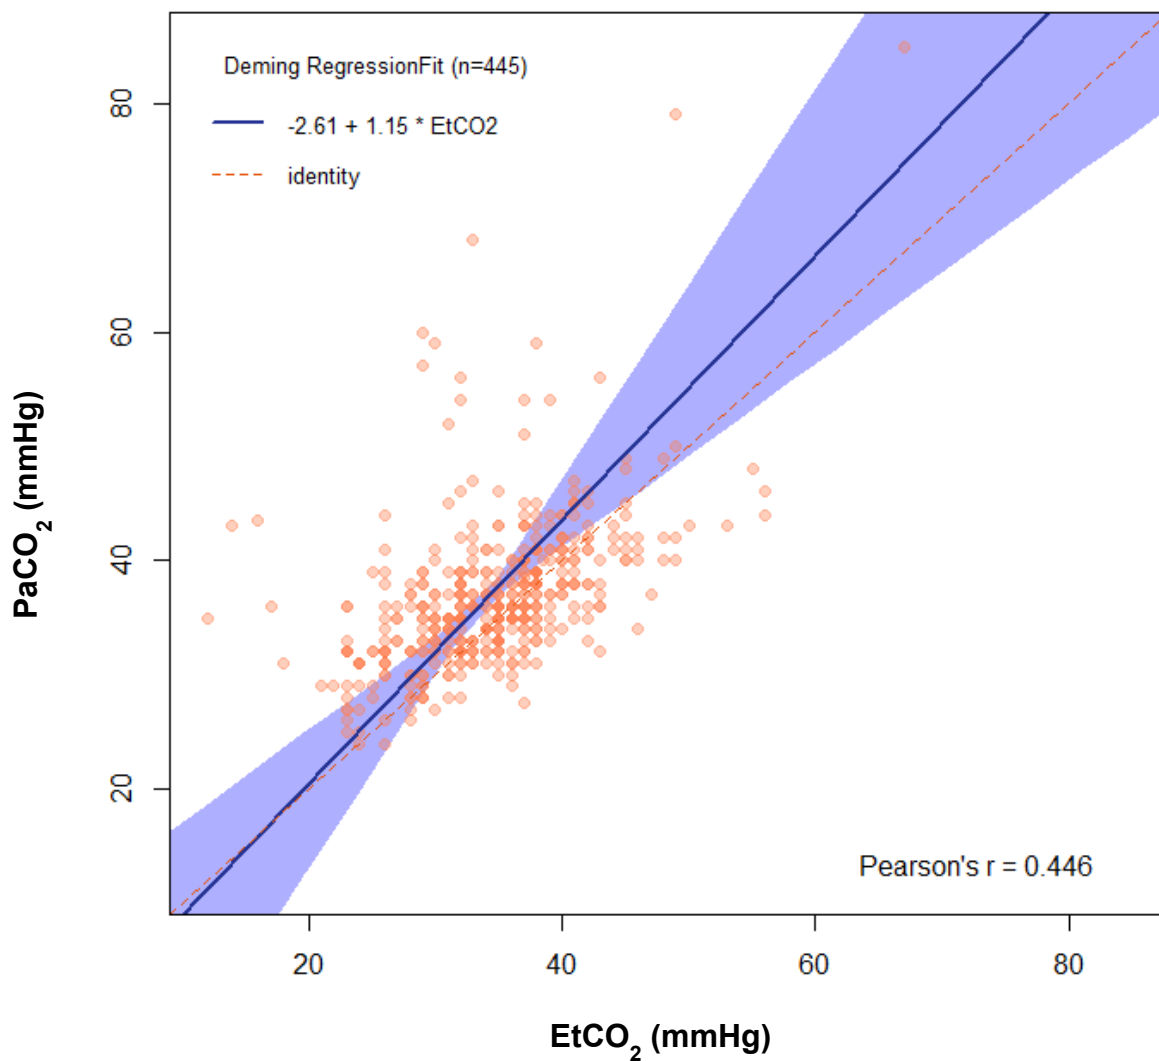

Red dots represent the 445 PaCO<sub>2</sub> - EtCO<sub>2</sub> pairs for 137 unique patients. Blue line represents the Deming regression line. Red dotted line indicates a theoretical fitted Deming line with no absolute constant difference between measures (intercept of zero), and no proportional difference between measures (slope of one).



**eFigure 5. Bland-Altman Plots of PaCO<sub>2</sub> and EtCO<sub>2</sub> Stratified by Age in Years**

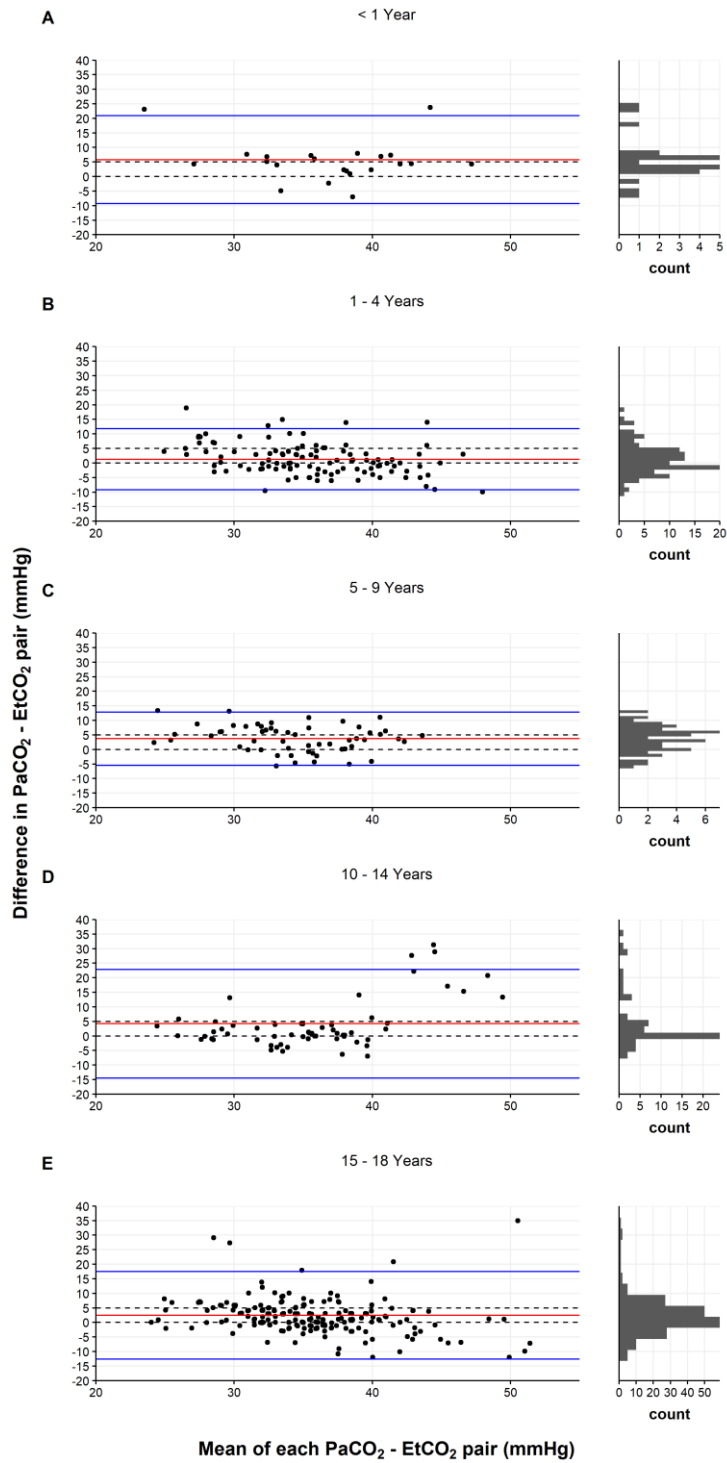

Bias (average PaCO<sub>2</sub>-EtCO<sub>2</sub> difference) is represented by the red line. The limits of agreement are represented by the blue lines and adjusted for repeated measures. *A priori* limits of acceptable agreement are represented by the dashed lines. Corresponding marginal histograms describe distribution of values between pairs. 5A contains 23 paired PaCO<sub>2</sub>-EtCO<sub>2</sub> pairs for 8 patients, 9 (39%) of these pairs had EtCO<sub>2</sub> values within 5mmHg of paired PaCO<sub>2</sub>. 5B contains 113 paired PaCO<sub>2</sub>-EtCO<sub>2</sub> pairs for 32 patients, 44 (39%) of these pairs had EtCO<sub>2</sub> values within 5mmHg of paired PaCO<sub>2</sub>. 5C contains 56 paired PaCO<sub>2</sub>-EtCO<sub>2</sub> pairs for 21 patients, 19 (34%) of these pairs had EtCO<sub>2</sub> values within 5mmHg of paired PaCO<sub>2</sub>. 5D contains 60 paired PaCO<sub>2</sub>-EtCO<sub>2</sub> pairs for 15 patients, 29 (48%) of these pairs had EtCO<sub>2</sub> values within 5mmHg of paired PaCO<sub>2</sub>. 5E contains 193 paired PaCO<sub>2</sub>-EtCO<sub>2</sub> pairs for 61 patients, 86 (45%) of these pairs had EtCO<sub>2</sub> values within 5mmHg of paired PaCO<sub>2</sub>.

**Figure 6.** Side-by-Side Boxplots of PaCO<sub>2</sub>-EtCO<sub>2</sub> Differences Stratified by Patient

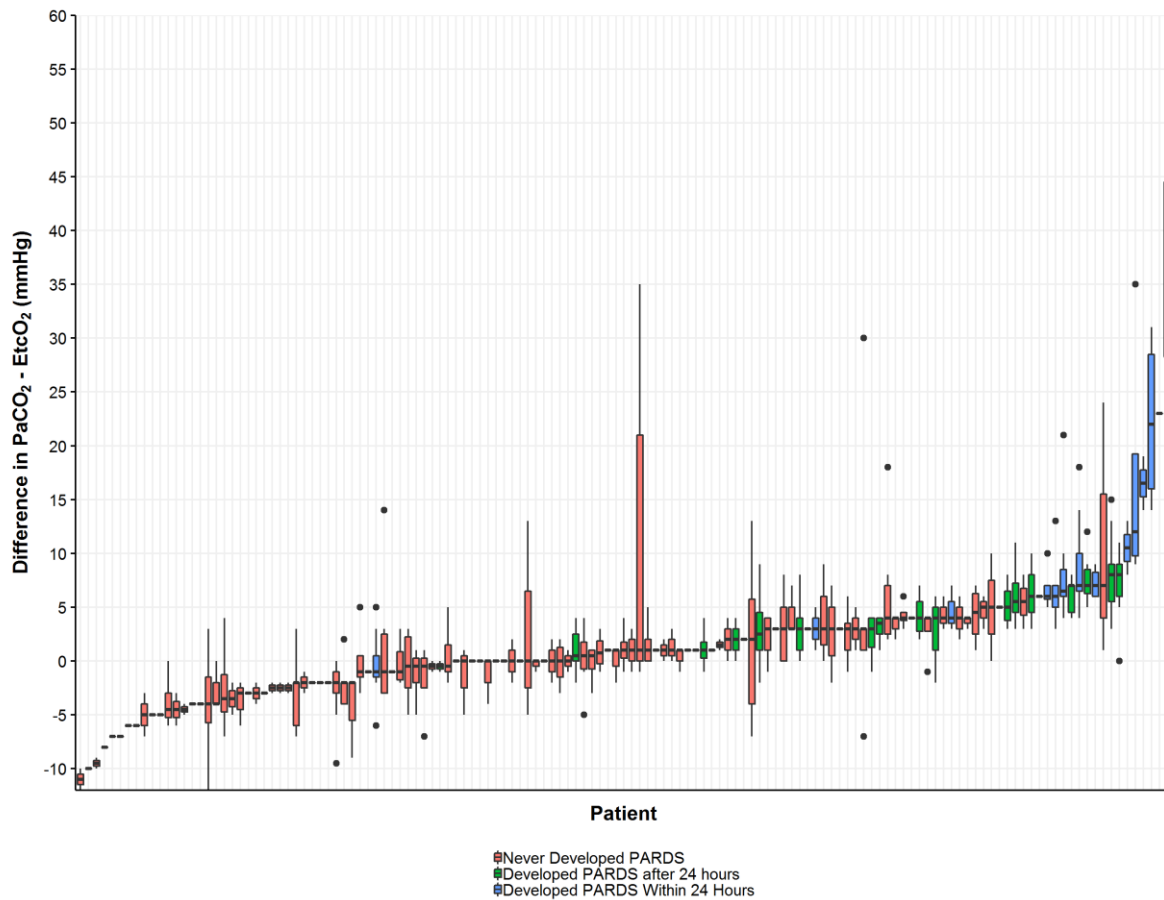

Plotted data represents all 445 PaCO<sub>2</sub>-EtCO<sub>2</sub> pairs obtained within 24 hours of Pediatric Intensive Care Unit (PICU) admission for 137 PEGASUS program patients. Center horizontal line indicates median PaCO<sub>2</sub>-EtCO<sub>2</sub> difference for each patient value. Top and bottom of the boxes represent 75<sup>th</sup> percentile and 25<sup>th</sup> percentile of PaCO<sub>2</sub>-EtCO<sub>2</sub> difference for each patient, whiskers represent the median plus and minus 1.5 times the interquartile range. Circles represent all values beyond the median + 1.5 times the interquartile range. Colors represent the timing of Pediatric Acute Respiratory Distress Syndrome (PARDS) development, with those who never developed PARDS in red (n = 101, pairs = 286), those who developed PARDS after 24 hours from PICU admission (n = 22, pairs = 92), and those who developed PARDS within 24 hours from PICU admission (n = 14, pairs = 67).
